# Supplementary material
Source: PubMed Central journal article supplement (PMC5595275)
Supplement: supp_WNL.0000000000004357_Table_e-1.pdf [file supp_WNL.0000000000004357_Table_e-1.pdf]

**Table e-1** Baseline characteristics of participating caregivers

|                                                                              | Care partners of randomized participants (n = 111) | Intervention (n=50) | Control (n=61) |
|------------------------------------------------------------------------------|----------------------------------------------------|---------------------|----------------|
| Women [n (%)]                                                                | 67 (60.4)                                          | 29 (58.0)           | 38 (62.3)      |
| Age                                                                          | 64.6 (9.2)                                         | 64.4 (8.7)          | 64.8 (9.7)     |
| Bachelor's degree or higher education [n (%)]                                | 61 (56.0)                                          | 26 (52.0)           | 35 (57.4)      |
| Ethnicity [n (%)]                                                            |                                                    |                     |                |
| Hispanic/Latino                                                              | 1 (0.9)                                            | 0 (0)               | 1 (1.64)       |
| Not Hispanic/Latino                                                          | 92 (82.9)                                          | 42 (84.0)           | 50 (82.0)      |
| Prefer not to answer/Unknown                                                 | 18 (16.2)                                          | 8 (16.0)            | 10 (16.4)      |
| Race [n (%)]                                                                 |                                                    |                     |                |
| White                                                                        | 88 (79.3)                                          | 38 (76.0)           | 50 (82.0)      |
| Other                                                                        | 7 (6.3)                                            | 5 (10.0)            | 2 (3.3)        |
| Prefer not to answer/unknown                                                 | 16 (14.4)                                          | 7 (14.0)            | 9 (14.8)       |
| Multidimensional Caregiver Strain Index Score (n = 80) [0 – 72] <sup>a</sup> | 11.6 (9.5)                                         | 11.2 (8.5)          | 12 (10.4)      |

Values are mean (standard deviation) unless otherwise noted

<sup>a</sup>Higher scores indicate higher amounts of strain for caregiver
