# Supplementary material
Source: PubMed Central journal article supplement (PMC5595275)

**Figure e-1.** Participant-rated patient global impression of change (n = 179)

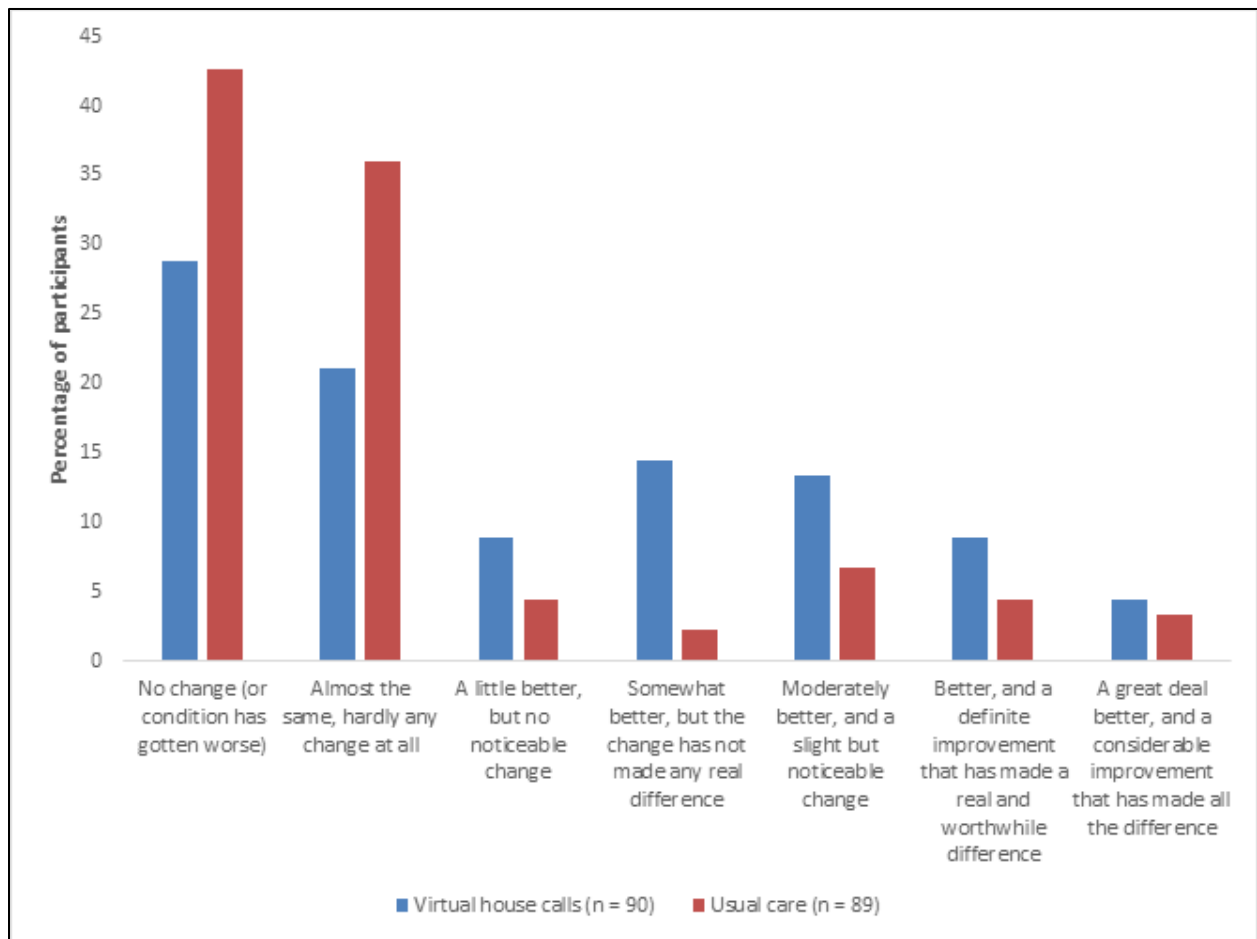

Supplement: supp_WNL.0000000000004357_Figure_e-1.pdf [file supp_WNL.0000000000004357_Figure_e-1.pdf]
